# Supplementary material for: Functional Recovery of Contused Spinal Cord in Rat with the Injection of Optimal‐Dosed Cerium Oxide Nanoparticles
Source: PubMed Central journal article supplement (PMC5644223; doi:10.1002/advs.201700034), 2017-07-08
Supplement: ADVS-4-na-s001.pdf [file ADVS-4-na-s001.pdf]

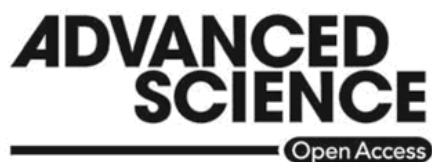

## Supporting Information

for *Adv. Sci.*, DOI: 10.1002/advs.201700034

Functional Recovery of Contused Spinal Cord in Rat with the Injection of Optimal-Dosed Cerium Oxide Nanoparticles

*Jong-Wan Kim, Chinmaya Mahapatra, Jin-Young Hong, Min Soo Kim, Kam W. Leong, Hae-Won Kim,\* and Jung Keun Hyun\**

## Supplementary Data

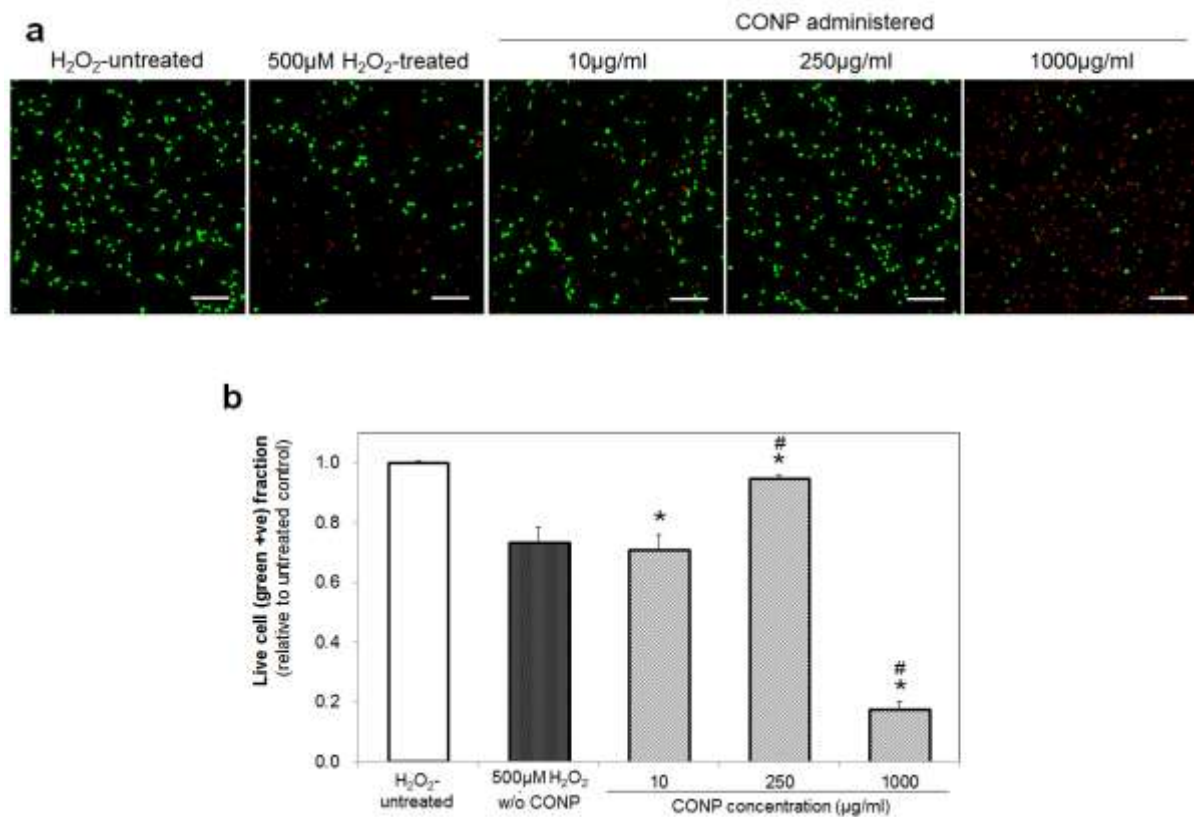

**Figure S1.** Live/dead cell assay of the 500 μM H<sub>2</sub>O<sub>2</sub>-treated cortical neurons with or without the CONP administration at various concentrations (10, 250, and 1,000 μg/ml) *in vitro*: (a) Representative images of live (green) and dead (red) cortical neurons (Scale bar = 100 μm), and (b) the relative live cell fractions (green-positive) compared (data presented w.r.t. H<sub>2</sub>O<sub>2</sub>-untreated control). \*p < 0.05 vs. untreated control group, and #p < 0.05 vs. H<sub>2</sub>O<sub>2</sub>-treated group, by Kruskal-Wallis test with Bonferroni correction.
